# Supplementary figures and images for: Improving endothelial health with food-derived H2S donors: an in vitro study with S-allyl cysteine and with a black-garlic extract enriched in sulfur-containing compounds
Source: Royal Society of Chemistry journal article supplement (doi:10.1039/d3fo00412k), 2023-01-01

**BLOT 1 (representative Western Blot in Fig. 4)**

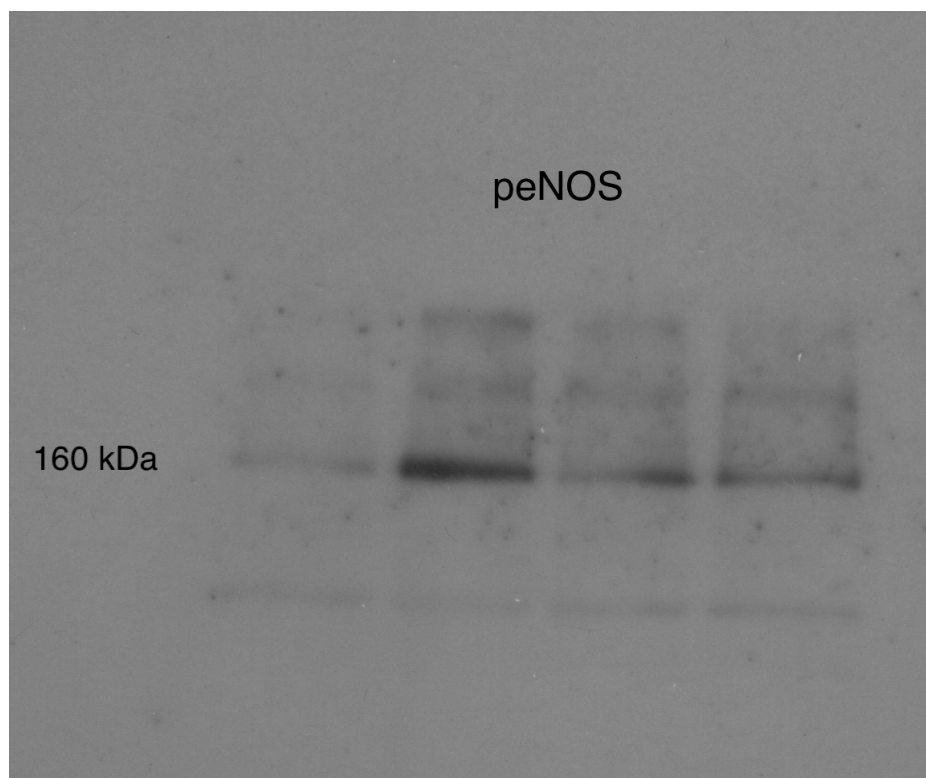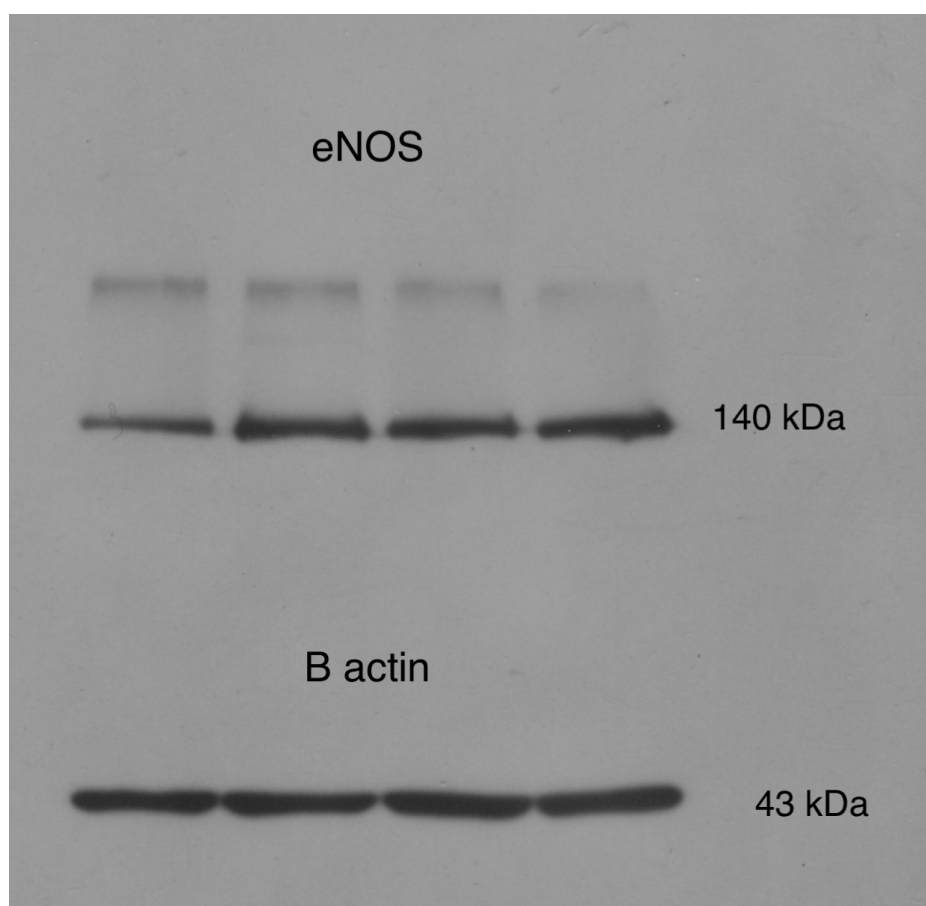

**BLOT 2**

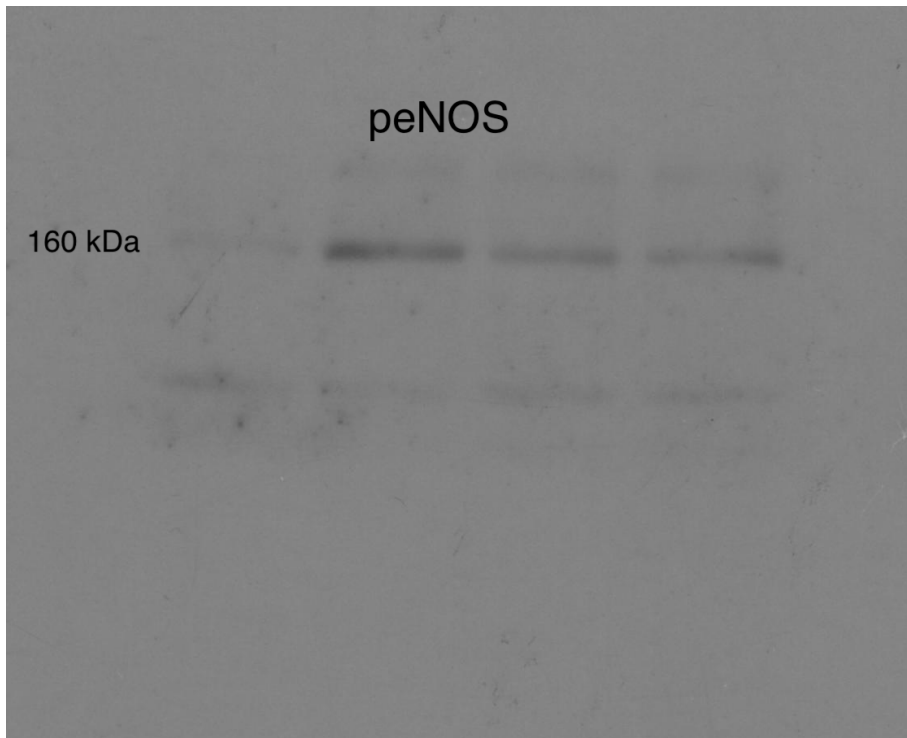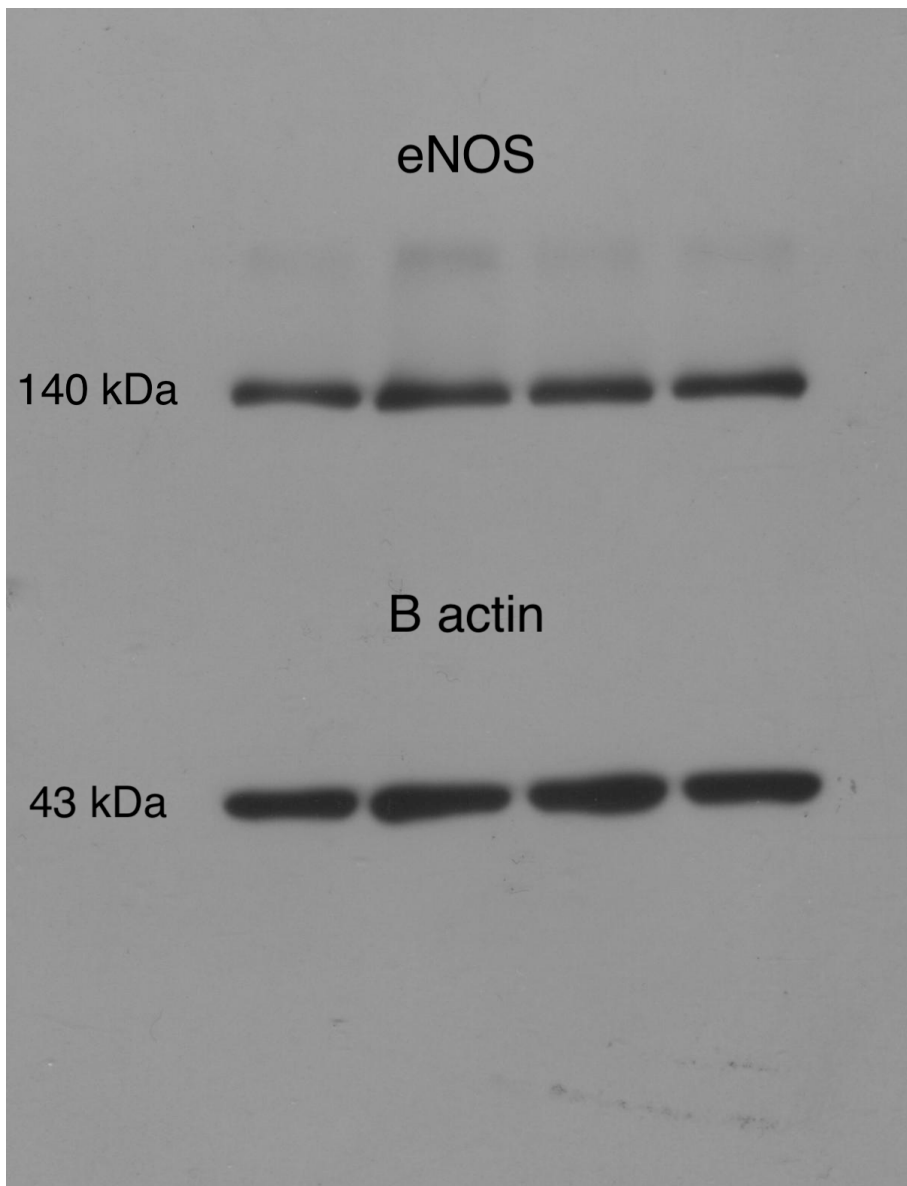

**BLOT 3**

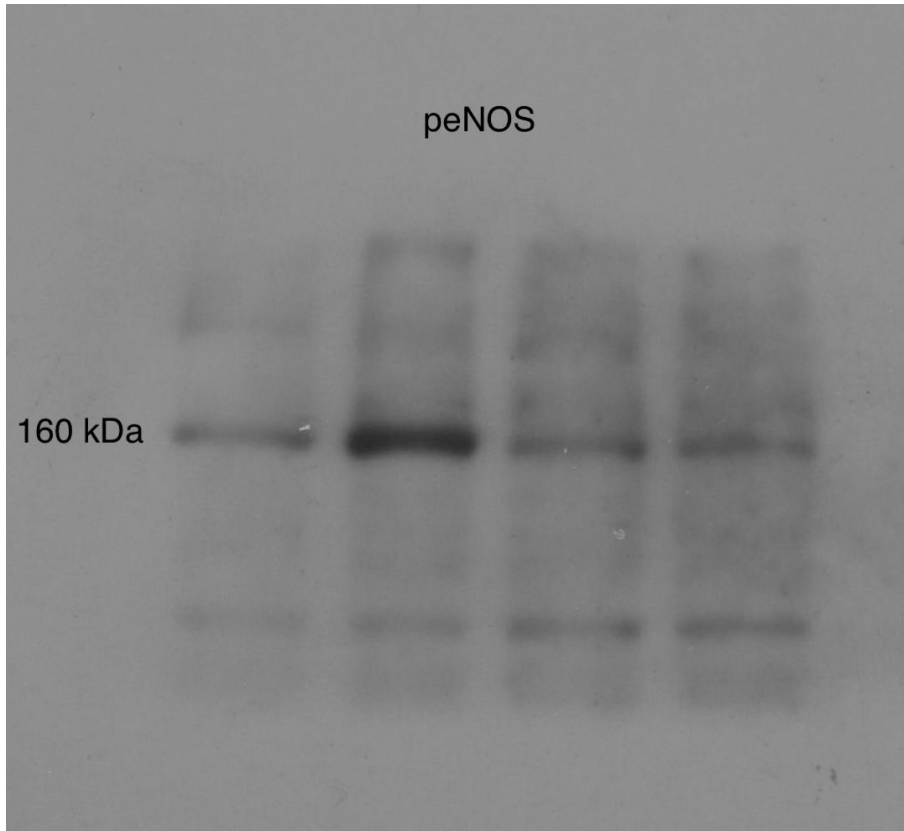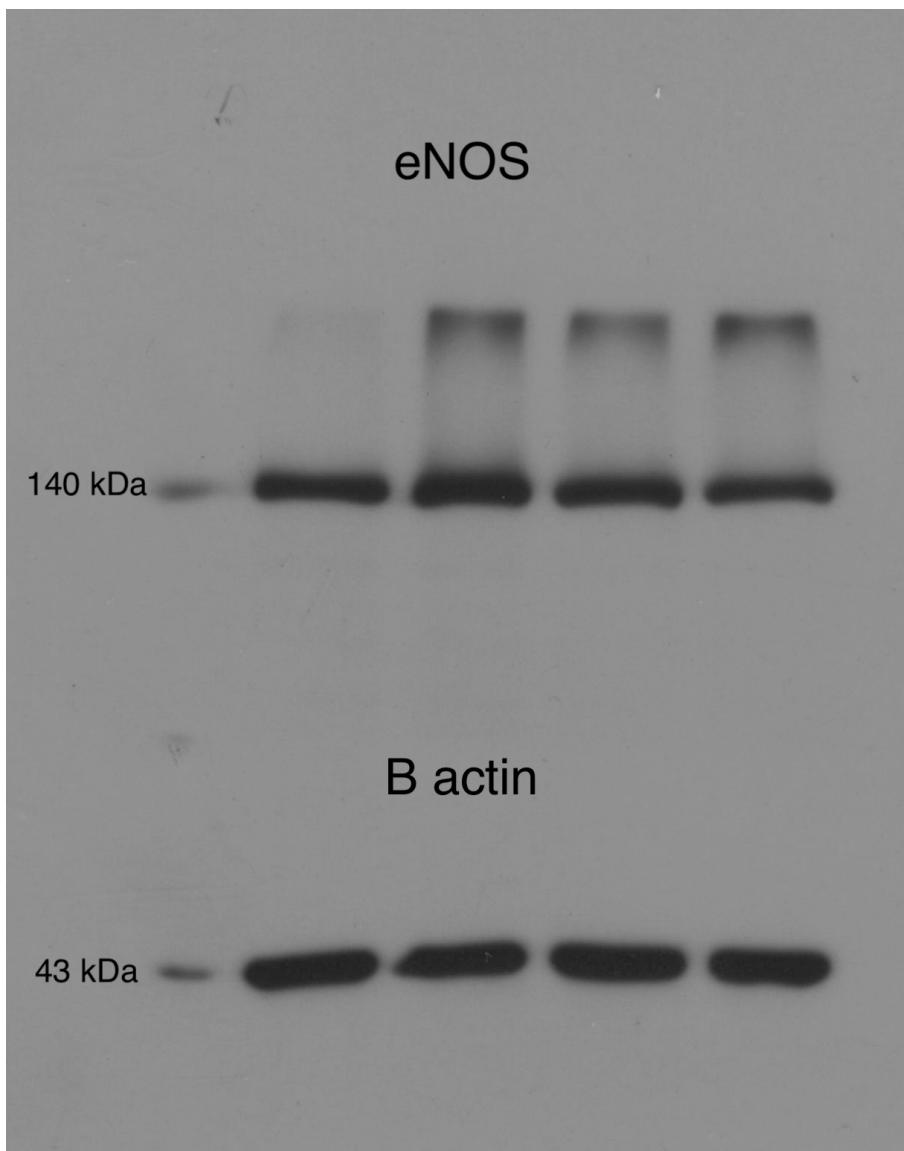

Supplement: d3fo00412k1.pdf [file d3fo00412k1.pdf]
